# Supplementary material for: Sympatric ecological divergence associated with a color polymorphism
Source: PubMed Central journal article supplement (PMC4594650; doi:10.1186/s12915-015-0192-7), 2015-10-05
Supplement: 12915_2015_192_MOESM1_ESM.pdf [file 12915_2015_192_MOESM1_ESM.pdf]

699 **Additional Files**

**Figure S1. Definition of eco-morphological measurements.** a, Anatomical

702 description of body landmarks: LM 1 = tip of snout; LM 2 = most posterior point of the lips; LM  
703 3, 4 = most anterior and posterior margin of the eye; LM 5 = intersection of operculum and  
704 ventral body outline; LM 6 = anterior base of dorsal fin; LM 7, 8 = dorsal and ventral base of  
705 pectoral fin; LM 9 = anterior base of pelvic fin; LM 10, 11 = anterior and posterior base of anal  
706 fin; LM 12 = posterior base of dorsal fin; LM 13, 14 = dorsal and ventral base of caudal fin; LM  
707 15 = midpoint of the caudal fin origin; LM 16 = nostril; LM 17 = dorsal end of pre-operculum;  
708 LM 18 = dorso-caudal origin of the operculum. b, Anatomical description of LPJ landmarks  
709 along with representative examples of “molariform” and “papilliform” LPJ morphologies: LM 1,  
710 2 & LM 10, 11 = tips of posterior and lateral processes of upper horn; LM 3, 9 = points of highest  
711 curvature in upper horn base; LM 4, 8 = points of closest intersection between horn base and  
712 dentition area; LM 5, 7 = points of highest curvature near the mid-point of the two adjacent  
713 landmarks; LM 6 = posterior-most point of lower pharyngeal jaw suture; LM 12-15 & 18-21 =  
714 points of highest curvature near the mid-point of the two adjacent landmarks; LM 16, 17 =  
715 anterior tips of lower horn processes; LM 22, 23 = most posterior teeth of the “external line” of  
716 the dentition area; LM 24 = point where the suture meets the dentition area.

717

718

719

720

721

722

Figure S1.

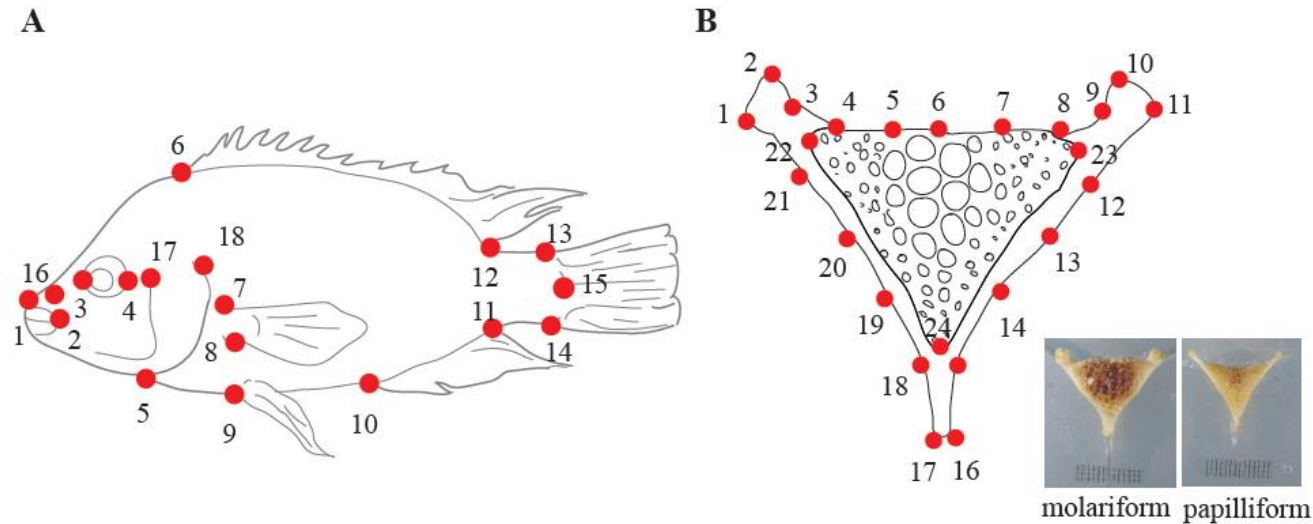

724  
725  
726  
727  
728  
729  
730  
731  
732  
733  
734  
735  
736  
737  
738  
739

**Figure S2. Logistic regression: Frequency distributions of the linear predictor for**

741 **gold and dark morphs.** a, Body Depth Index and b, LPJ weight. The histograms (upper panels)  
742 indicate absolute frequency of individuals of each color morph (y-axis), whereas the density  
743 distributions (bottom panels) are corrected for unequal sample sizes. The linear predictor (x-axis)  
744 is a linear function that defines the relationship between the dependent (i.e. gold/dark) and the  
745 explanatory variables (i.e. BDI or LPJ weight, both corrected for allometry). The likelihood of a  
746 given individual being a gold morph, as predicted by the model and reflected in the linear  
747 predictor, clearly increased with higher values of BDI and LPJ weight. The linear predictor for  
748 BDI was  $-0.99 + 15.75 \cdot \text{BDI}$  and the one for LPJ weight was  $-0.45 + 1.49 \cdot \text{LPJ weight}$ . Gelman  
749 and Hill's "divide by 4 rule" [57] allows to interpret logistic regression coefficients in terms of  
750 the predicted probabilities of the model outcome (slope for BDI-model = 15.75; slope for LPJ  
751 weight-model 1.49). Practically, when considering a shift in increasing BDI of  $\sim 0.1$  (BDI ranges  
752 from -0.1 to 0.09, spanning 0.19 units) the probability of being gold increased by maximally 39.4  
753 %. When considering a relative shift of LPJ weight of increasing 1 unit (LPJ weight ranges from  
754 -1.93 to 2.23, spanning 4.16 units) the probability of being gold increased by maximally 37.3 %.

755  
756  
757  
758  
759  
760  
761  
762  
763

Figure S2.

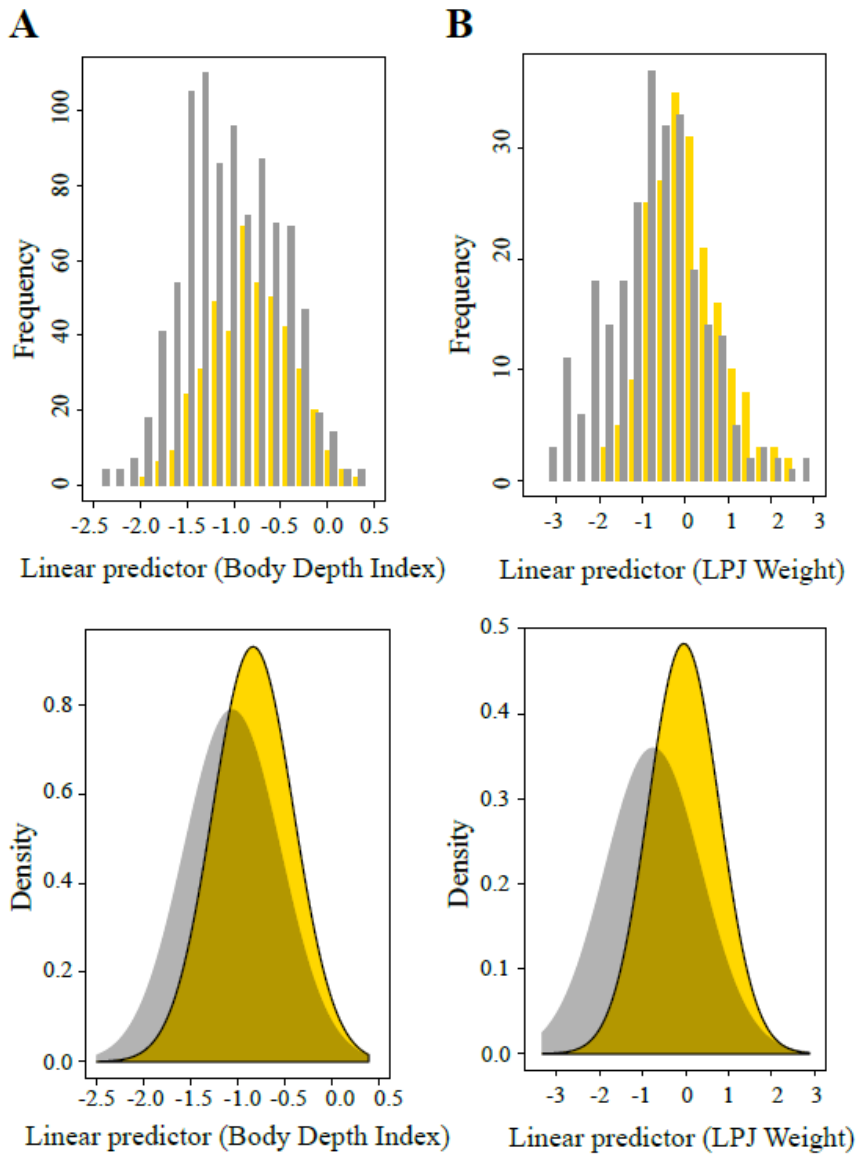

765

766

767

768

769

770

771

772

**Figure S3. Residual analysis of stable isotope data.** The assumptions of the linear

774 mixed effects model dealing with color morph differentiation in stable isotopes were visually  
775 assessed. a, Plot of residuals vs. fitted values to assess possible deviations of the residuals' mean  
776 from zero. b, Q-Q-plot of residuals, to assess whether the residuals conform to normality. c, Plot  
777 of residual variance vs. fitted values to evaluate variance homogeneity. d, Q-Q-plot of random  
778 effects to assess whether random effects are normally distributed after implementation into the  
779 model.

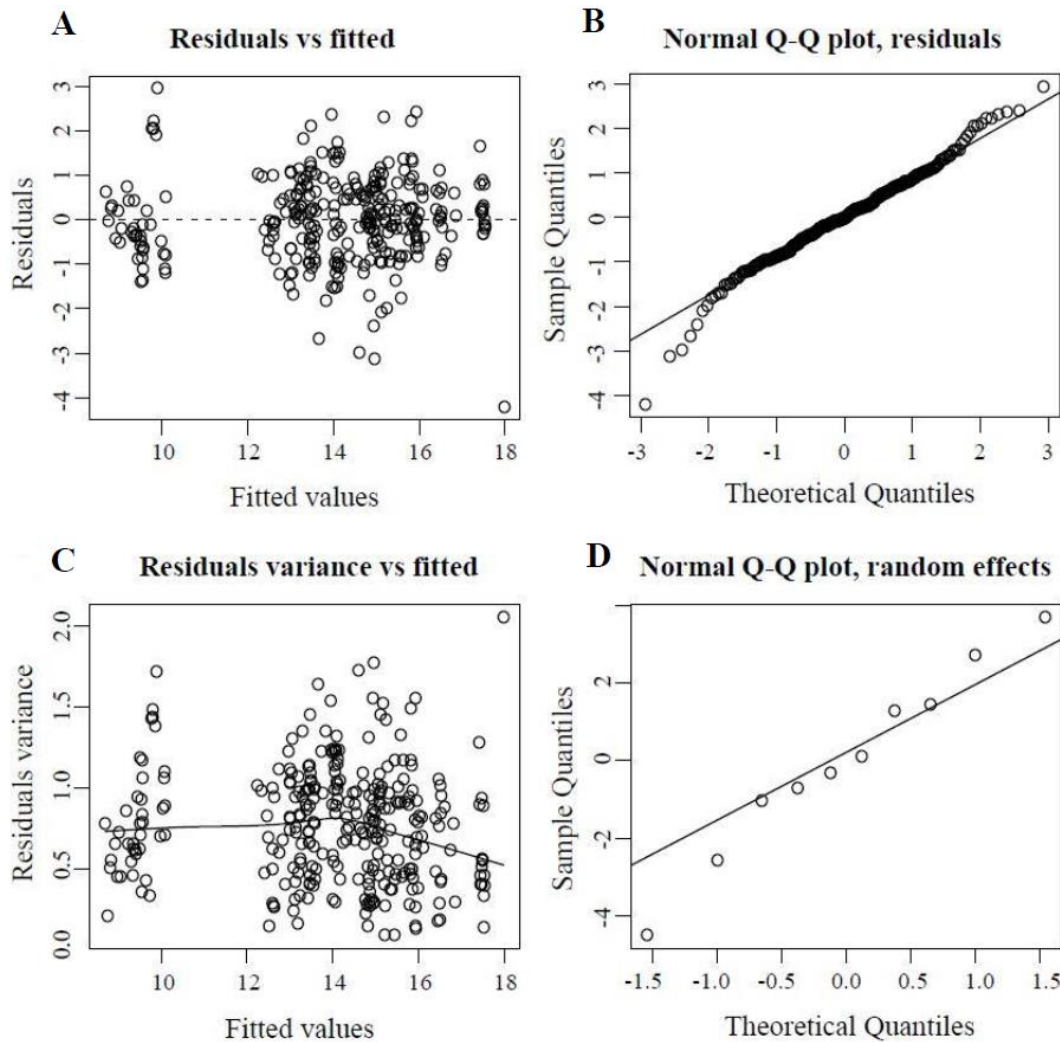

780

781

**Table S1. Sample sizes of color morphs used for each analysis.**

| Lake        | Species                   | Body shape<br>(n = 1,117) |        | BDI<br>(n = 1,354) |        | LPJ shape<br>(n = 465) |        | Stable isotopes<br>(n = 298) |        | Evol. trajectory<br>(n = 232) |        |
|-------------|---------------------------|---------------------------|--------|--------------------|--------|------------------------|--------|------------------------------|--------|-------------------------------|--------|
|             |                           | n gold                    | n dark | n gold             | n dark | n gold                 | n dark | n gold                       | n dark | n gold                        | n dark |
| As. Managua | <i>A. tolteca</i>         | 51                        | 138    | 52                 | 232    | 43                     | 54     | 36                           | 38     | 28                            | 26     |
| Apoyeque    | <i>A. cf. citrinellus</i> | 7                         | 25     | 7                  | 107    | 7                      | 19     | 8                            | 11     | 7                             | 6      |
| Masaya      | <i>A. cf. citrinellus</i> | 16                        | 38     | 16                 | 38     | 15                     | 33     | 13                           | 20     | 10                            | 15     |
|             | <i>A. cf. labiatus</i>    | 13                        | 2      | 13                 | 2      | 8                      | 2      | 17                           | 3      | 8                             | 2      |
| Xiloá       | <i>A. sagittae</i>        | 6                         | 133    | 6                  | 133    | 4                      | 39     | 2                            | 20     | 2                             | 14     |
|             | <i>A. xiloaensis</i>      | 67                        | 77     | 67                 | 77     | 31                     | 21     | 18                           | 16     | 14                            | 10     |
| Managua     | <i>A. citrinellus</i>     | 60                        | 114    | 60                 | 114    | 24                     | 21     | 16                           | 14     | 15                            | 13     |
|             | <i>A. labiatus</i>        | 4                         | 32     | 4                  | 32     | 4                      | 13     | 2                            | 16     | 2                             | 13     |
| Nicaragua   | <i>A. citrinellus</i>     | 104                       | 120    | 104                | 120    | 32                     | 30     | 10                           | 11     | 10                            | 11     |
|             | <i>A. labiatus</i>        | 114                       | 56     | 114                | 56     | 34                     | 31     | 14                           | 13     | 13                            | 13     |

783

784

**Table S2. Pair-wise morphological differentiation between Midas cichlid color**

786 **morphs.** The outcome of discriminant function analyses of body shape and lower pharyngeal jaw  
787 morphology is shown for each of the ten morph pairs. The degree of body and pharyngeal jaw  
788 shape differentiation is indicated by Procrustes distances.

| Lake        | Species                   | Body shape  |                        |         | LPJ shape   |                        |         |
|-------------|---------------------------|-------------|------------------------|---------|-------------|------------------------|---------|
|             |                           | Proc. dist. | Hotell. T <sup>2</sup> | p-value | Proc. dist. | Hotell. T <sup>2</sup> | p-value |
| As. Managua | <i>A. tolteca</i>         | 0.011       | 118.78                 | <0.0001 | 0.012       | 80.58                  | <0.0001 |
| Apoyeque    | <i>A. cf. citrinellus</i> | 0.022       | 6002.65                | 0.304   | 0.019       | 368.74                 | 0.328   |
| Masaya      | <i>A. cf. citrinellus</i> | 0.013       | 116.09                 | 0.182   | 0.007       | 20.85                  | 0.931   |
|             | <i>A. cf. labiatus</i>    | 0.02        | 79.69                  | 0.766   | 0.036       | 20.34                  | 0.174   |
| Xiloá       | <i>A. sagittae</i>        | 0.023       | 98.22                  | 0.002   | 0.025       | 49.35                  | 0.414   |
|             | <i>A. xiloaensis</i>      | 0.025       | 265.03                 | <0.0001 | 0.022       | 167.34                 | <0.0001 |
| Managua     | <i>A. citrinellus</i>     | 0.01        | 67.99                  | 0.01    | 0.037       | 113.38                 | 0.014   |
|             | <i>A. labiatus</i>        | 0.03        | 121.04                 | 0.954   | 0.016       | 85.6                   | 0.886   |
| Nicaragua   | <i>A. citrinellus</i>     | 0.012       | 189.56                 | <0.0001 | 0.006       | 24.23                  | 0.817   |
|             | <i>A. labiatus</i>        | 0.01        | 96.25                  | <0.0001 | 0.008       | 36.99                  | 0.353   |

789

790

**Table S3. Overview of color-associated divergence in eco-morphology and stable**

792 **isotope ecology.** The table shows mean regression residuals of BDI and LPJ weight after  
 793 allometry correction,  $\delta^{15}\text{N}$  as well as standard length for each group. Boldface indicates the color  
 794 morph group with relatively higher values within each morph pair. The average gold morph in  
 795 each morph pair generally exhibited higher BDI (7/10) and LPJ values (9/10), even after  
 796 correcting for size and allometric effects. In 9 out of 10 morph pairs the gold morph was at a  
 797 relatively lower trophic level than the dark morph as inferred from  $\delta^{15}\text{N}$ .

| Lake        | Species                   | BDI [mean]    |               | LPJ weight [mean] |              | $\delta^{15}\text{N}$ [‰] |              | Standard length [mm] |              |
|-------------|---------------------------|---------------|---------------|-------------------|--------------|---------------------------|--------------|----------------------|--------------|
|             |                           | gold          | dark          | gold              | dark         | gold                      | dark         | gold                 | dark         |
| As. Managua | <i>A. tolteca</i>         | <b>-0.005</b> | -0.026        | <b>-0.002</b>     | -0.386       | 15.09                     | <b>15.42</b> | 100.6                | <b>113.2</b> |
| Apoyeque    | <i>A. cf. citrinellus</i> | 0.002         | <b>0.005</b>  | <b>0.178</b>      | 0.017        | 8.9                       | <b>9.36</b>  | 99.3                 | <b>102.3</b> |
| Masaya      | <i>A. cf. citrinellus</i> | <b>0.032</b>  | 0.024         | 0.058             | <b>0.086</b> | <b>13.9</b>               | 13.81        | 90.2                 | <b>106.3</b> |
|             | <i>A. cf. labiatus</i>    | <b>0.039</b>  | 0.012         | <b>0.264</b>      | -0.032       | 13.19                     | <b>13.36</b> | 78.5                 | <b>92.2</b>  |
| Xiloá       | <i>A. sagittae</i>        | <b>-0.017</b> | -0.041        | <b>-0.330</b>     | -1.217       | 14.51                     | <b>14.78</b> | <b>178.0</b>         | 168.6        |
|             | <i>A. xiloaensis</i>      | <b>0.021</b>  | -0.005        | <b>0.533</b>      | -0.338       | 13.22                     | <b>14.62</b> | 158.0                | <b>158.1</b> |
| Managua     | <i>A. citrinellus</i>     | <b>0.042</b>  | 0.036         | <b>0.263</b>      | 0.131        | 15.93                     | <b>16.53</b> | <b>165.3</b>         | 160.0        |
|             | <i>A. labiatus</i>        | <b>0.007</b>  | -0.002        | <b>0.460</b>      | 0.314        | 17.18                     | <b>17.51</b> | 112.8                | <b>154.9</b> |
| Nicaragua   | <i>A. citrinellus</i>     | 0.011         | <b>0.023</b>  | <b>1.078</b>      | 0.785        | 8.72                      | <b>10.61</b> | <b>154.9</b>         | 148.6        |
|             | <i>A. labiatus</i>        | -0.014        | <b>-0.009</b> | <b>-0.250</b>     | -0.311       | 12.43                     | <b>13.15</b> | 136.4                | <b>146.4</b> |

798  
 799  
 800  
 801



**Table S4. Evolutionary trajectory analysis.** The evolutionary trajectory analysis is based on the ecological variables BDI,

803 LPJ weight as well as the isotopic signatures of  $\delta^{15}\text{N}$  and  $\delta^{13}\text{C}$ . The table shows absolute values (above the diagonal) and associated  $p$ -  
 804 values (below the diagonal) for pair-wise differences in trajectory size and orientation. Bold font indicates  $p$ -values that differ statistically  
 805 ( $< 0.05$ ; no correction for multiple tests). Across all comparisons combined, length ( $\Delta d = 0.48$ ,  $p = 0.005$ ) and orientation ( $\theta = 1625.74$ ,  $p$   
 806  $= 0.001$ ) differ though there is a large component of trajectories being parallel across many morph pairs (Fig. 2d).

|                 |                                    | Trajectory size           |                   |                       |                    |                           |                        |                       |                    |                    |                      |
|-----------------|------------------------------------|---------------------------|-------------------|-----------------------|--------------------|---------------------------|------------------------|-----------------------|--------------------|--------------------|----------------------|
|                 |                                    | Apoyeque                  | As. Managua       | Managua               | Managua            | Masaya                    | Masaya                 | Nicaragua             | Nicaragua          | Xiloá              | Xiloá                |
|                 |                                    | <i>A. cf. citrinellus</i> | <i>A. tolteca</i> | <i>A. citrinellus</i> | <i>A. labiatus</i> | <i>A. cf. citrinellus</i> | <i>A. cf. labiatus</i> | <i>A. citrinellus</i> | <i>A. labiatus</i> | <i>A. sagittae</i> | <i>A. xiloaensis</i> |
| <i>p</i> -value | Apoyeque <i>A. cf. citrinellus</i> |                           | 0.01              | 0.50                  | 0.01               | 0.45                      | 0.41                   | 0.77                  | 0.26               | 2.04               | 0.59                 |
|                 | As. Managua <i>A. tolteca</i>      | 0.980                     |                   | 0.49                  | 0.00               | 0.44                      | 0.42                   | 0.78                  | 0.25               | 2.05               | 0.60                 |
|                 | Managua <i>A. citrinellus</i>      | 0.249                     | 0.128             |                       | 0.483              | 0.05                      | 0.91                   | 1.26                  | 0.24               | 2.54               | 1.09                 |
|                 | Managua <i>A. labiatus</i>         | 0.981                     | 0.993             | 0.338                 |                    | 0.43                      | 0.43                   | 0.78                  | 0.24               | 2.06               | 0.61                 |
|                 | Masaya <i>A. cf. citrinellus</i>   | 0.307                     | 0.195             | 0.898                 | 0.388              |                           | 0.86                   | 1.21                  | 0.19               | 2.49               | 1.04                 |
|                 | Masaya <i>A. cf. labiatus</i>      | 0.449                     | 0.375             | 0.107                 | 0.467              | 0.121                     |                        | 0.35                  | 0.67               | 1.63               | 0.18                 |
|                 | Nicaragua <i>A. citrinellus</i>    | 0.092                     | <b>0.031</b>      | <b>0.001</b>          | 0.138              | <b>0.002</b>              | 0.489                  |                       | 1.02               | 1.28               | 0.17                 |
|                 | Nicaragua <i>A. labiatus</i>       | 0.563                     | 0.450             | 0.515                 | 0.634              | 0.614                     | 0.205                  | <b>0.008</b>          |                    | 2.30               | 0.85                 |
|                 | Xiloá <i>A. sagittae</i>           | <b>0.001</b>              | <b>0.001</b>      | <b>0.000</b>          | <b>0.001</b>       | <b>0.000</b>              | <b>0.012</b>           | <b>0.019</b>          | <b>0.000</b>       |                    | 1.45                 |
|                 | Xiloá <i>A. xiloaensis</i>         | 0.185                     | 0.079             | <b>0.004</b>          | 0.239              | <b>0.006</b>              | 0.720                  | 0.673                 | <b>0.025</b>       | <b>0.010</b>       |                      |

  

|                 |                                    | Trajectory direction [°]  |                   |                       |                    |                           |                        |                       |                    |                    |                      |
|-----------------|------------------------------------|---------------------------|-------------------|-----------------------|--------------------|---------------------------|------------------------|-----------------------|--------------------|--------------------|----------------------|
|                 |                                    | Apoyeque                  | As. Managua       | Managua               | Managua            | Masaya                    | Masaya                 | Nicaragua             | Nicaragua          | Xiloá              | Xiloá                |
|                 |                                    | <i>A. cf. citrinellus</i> | <i>A. tolteca</i> | <i>A. citrinellus</i> | <i>A. labiatus</i> | <i>A. cf. citrinellus</i> | <i>A. cf. labiatus</i> | <i>A. citrinellus</i> | <i>A. labiatus</i> | <i>A. sagittae</i> | <i>A. xiloaensis</i> |
| <i>p</i> -value | Apoyeque <i>A. cf. citrinellus</i> |                           | 106.24            | 109.29                | 158.57             | 127.92                    | 81.52                  | 28.68                 | 135.24             | 95.24              | 112.32               |
|                 | As. Managua <i>A. tolteca</i>      | 0.619                     |                   | 91.93                 | 91.52              | 118.17                    | 30.35                  | 129.35                | 47.27              | 12.23              | 14.04                |
|                 | Managua <i>A. citrinellus</i>      | 0.523                     | 0.310             |                       | 76.67              | 66.21                     | 87.39                  | 117.74                | 52.07              | 99.75              | 78.19                |
|                 | Managua <i>A. labiatus</i>         | 0.101                     | 0.410             | 0.494                 |                    | 34.42                     | 118.70                 | 130.66                | 64.58              | 101.07             | 86.28                |
|                 | Masaya <i>A. cf. citrinellus</i>   | 0.403                     | 0.424             | 0.508                 | 0.770              |                           | 140.41                 | 105.36                | 84.02              | 126.46             | 109.24               |
|                 | Masaya <i>A. cf. labiatus</i>      | 0.593                     | 0.705             | 0.433                 | 0.313              | 0.215                     |                        | 108.94                | 59.78              | 26.93              | 33.56                |
|                 | Nicaragua <i>A. citrinellus</i>    | 0.741                     | 0.870             | 0.626                 | 0.385              | 0.523                     | 0.546                  |                       | 162.37             | 117.30             | 138.25               |
|                 | Nicaragua <i>A. labiatus</i>       | 0.445                     | 0.130             | 0.408                 | 0.518              | 0.463                     | 0.509                  | 0.218                 |                    | 58.87              | 35.42                |
|                 | Xiloá <i>A. sagittae</i>           | 0.601                     | 0.925             | 0.321                 | 0.379              | 0.321                     | 0.857                  | 0.768                 | 0.263              |                    | 24.03                |
|                 | Xiloá <i>A. xiloaensis</i>         | 0.396                     | 0.934             | 0.574                 | 0.539              | 0.479                     | 0.824                  | 0.232                 | 0.791              | 0.927              |                      |

807

808
